# Supplementary material for: Cattle with a precise, zygote-mediated deletion safely eliminate the major milk allergen beta-lactoglobulin
Source: PubMed Central journal article supplement (PMC5955954; doi:10.1038/s41598-018-25654-8), 2018-05-16
Supplement: 41598_2018_25654_MOESM1_ESM.pdf [file 41598_2018_25654_MOESM1_ESM.pdf]

## Supplementary Information

### Cattle with a precise, zygote-mediated deletion safely eliminate the major milk allergen beta-lactoglobulin

Jingwei Wei, Stefan Wagner, Paul Maclean, Brigid Brophy, Sally Cole, Grant Smolenski, Dan F. Carlson, Scott. C. Fahrenkrug, David N. Wells and Götz Laible

#### Supplementary Figures

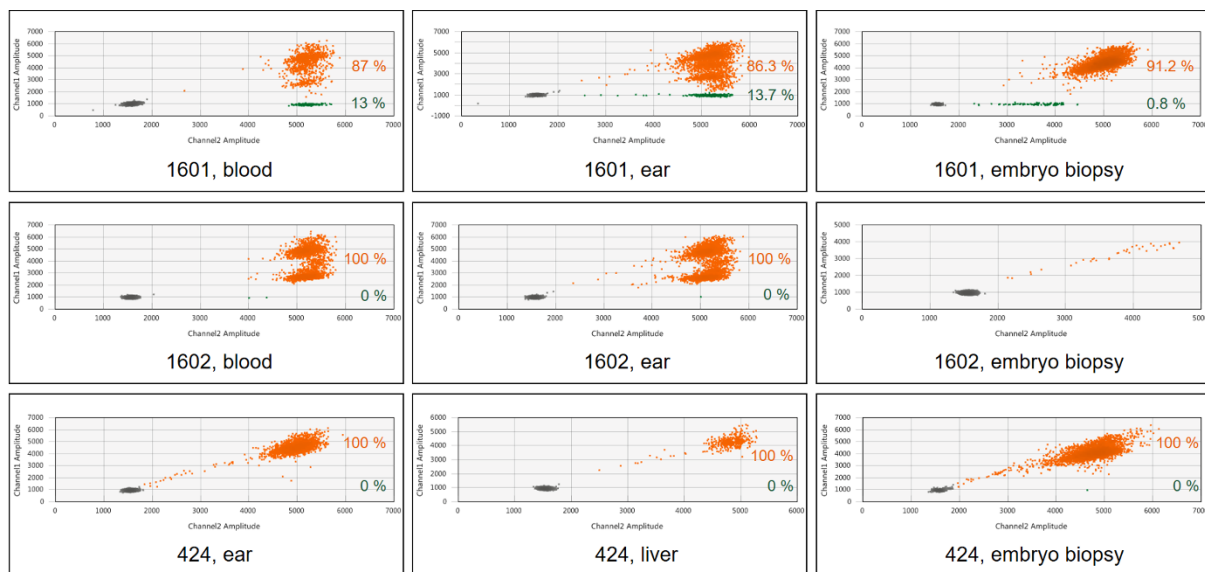

#### Supplementary Fig. S1: Assessment of the allelic composition of *LGB* target locus by ddPCR.

Shown are 2D amplification plots with the nine bp deletion HDR probe for the indicated 1601, 1602 and 424 samples. Orange dots represent HDR-positive droplets, green droplets represent wild type and non-HDR indel alleles and black dots represent droplets with no amplification. Contributions of the nine bp deletion and wild type/non-HDR indel alleles are given for each plot.

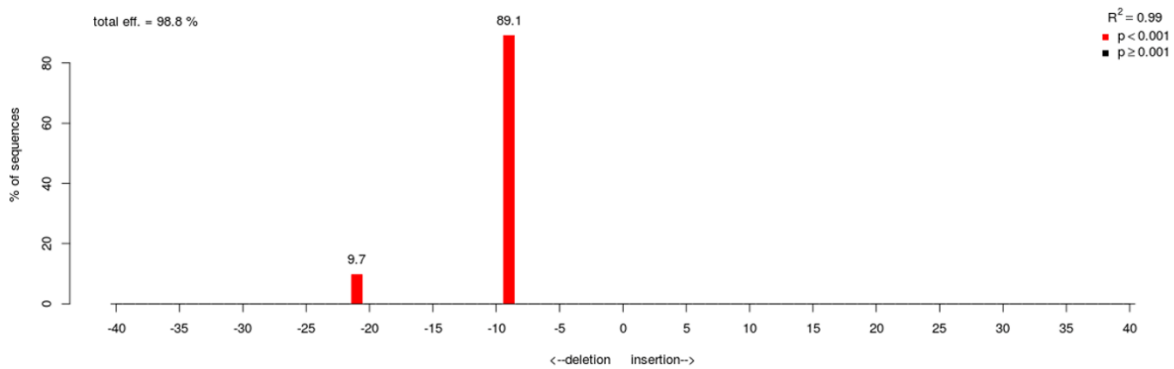

**Supplementary Fig. S2: TIDE analysis.**

Shown are the two allelic variants and their relative quantities predicted by TIDE analysis to be present in the amplified LGB fragment from 1601 genomic DNA isolated from a blood sample.

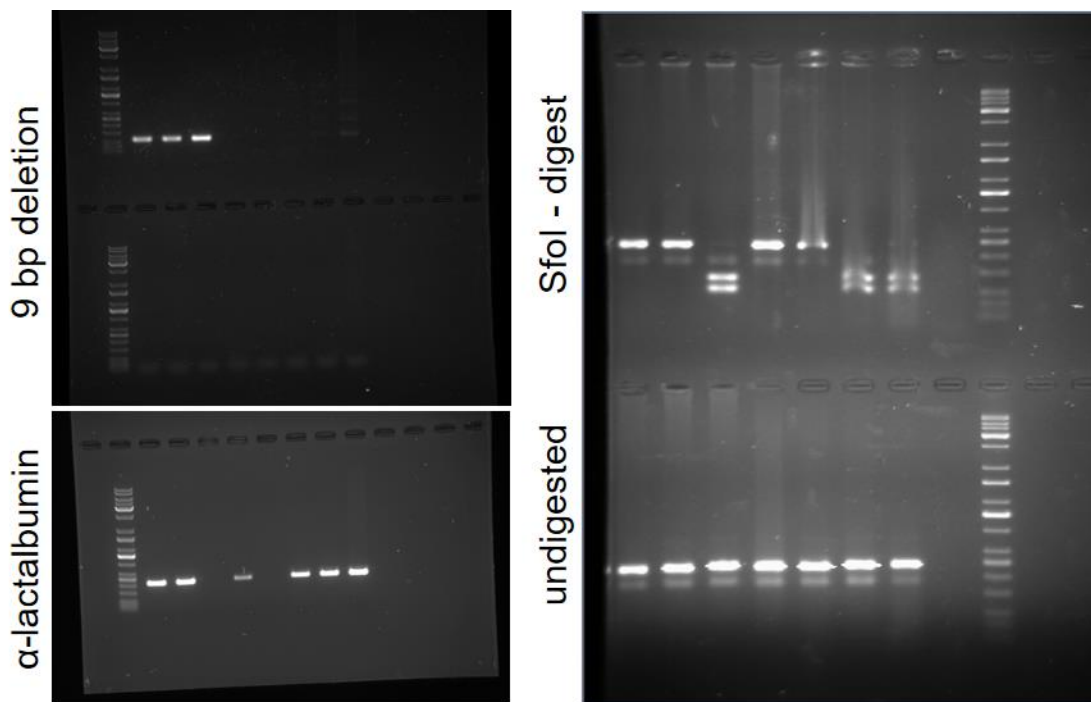

**Supplementary Fig. S3: Full size gel photos used for the cropped images shown in Fig. 3.**

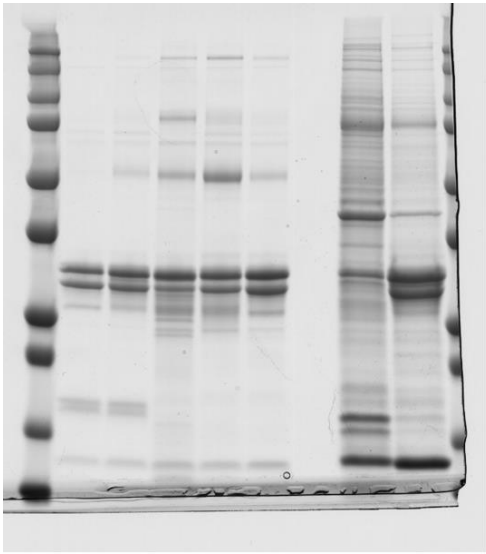

Coomassie

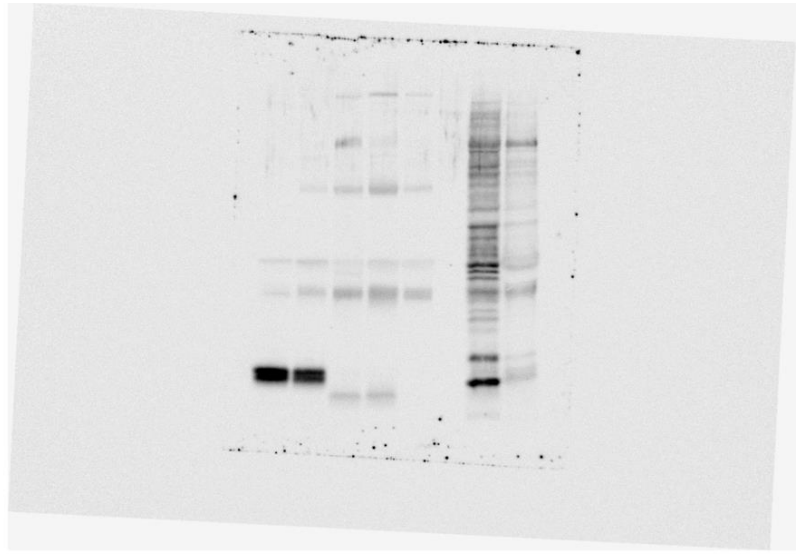

western

**Supplementary Fig. S4: Full size protein gel and western membrane photos used for the cropped images shown in Fig. 5.**

1601

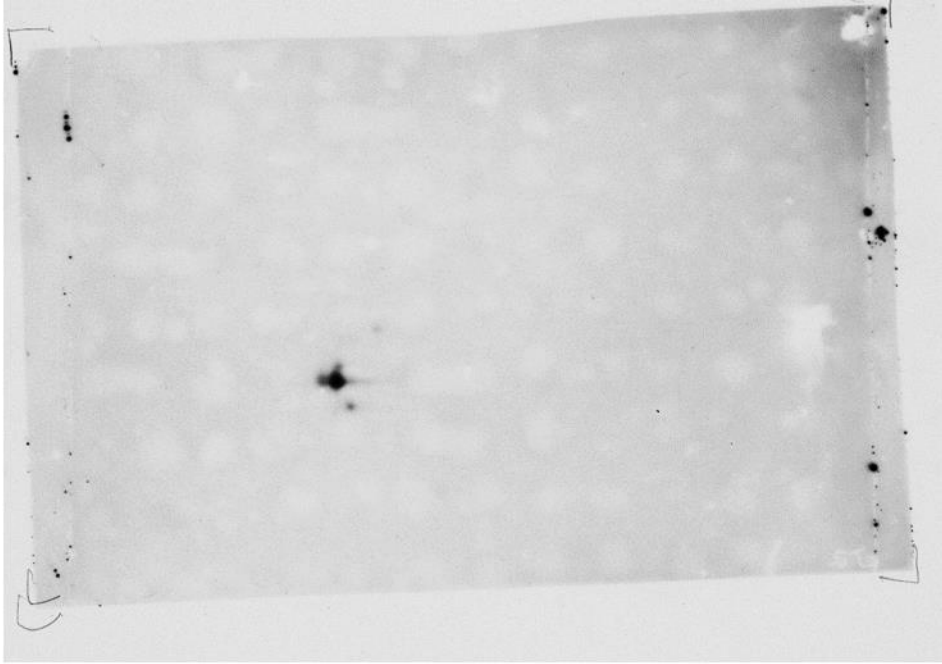

WT

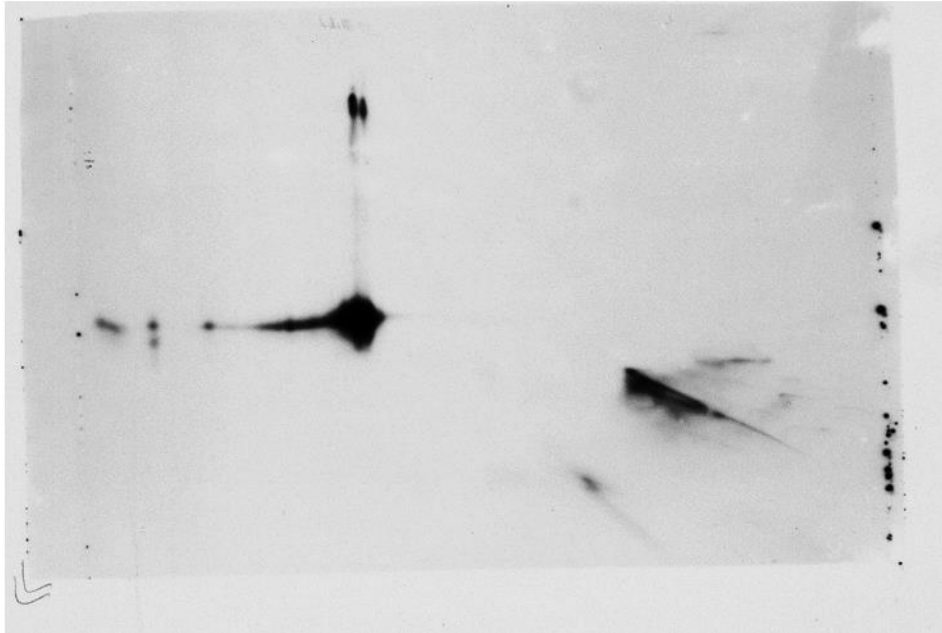

**Supplementary Fig. S5: Full size western membrane photos used for the cropped images shown in Fig. 6A.**

## Supplementary Tables

**Table S1: Summary of *in vitro* embryo development of IVF zygotes co-injected with TALENs and ODN HDR template.**

| IVF Sire   | Injection sessions | TALEN plasmids | ssODN | Zygotes injected | Total embryo development | Development to grade1/2 | nPCR* +ve     | nPCR* +ve & TaqMan +ve |
|------------|--------------------|----------------|-------|------------------|--------------------------|-------------------------|---------------|------------------------|
| Deacon     | 20                 | btBLG 1.2      | 986   | 1219             | 452/1219 (37 %)          | 193/1219 (16 %)         | 64/193 (33 %) | 43/193 (22 %)          |
| Reeds Chee | 4                  | btBLG 1.2      | 986   | 226              | 83/226 (37 %)            | 28/226 (12 %)           | 5/28 (18 %)   | 1/28 (4 %)             |
| Sirocco    | 1                  | btBLG 1.2      | 986   | 66               | 23/66 (35 %)             | 13/66 (20 %)            | 6/13 (46 %)   | 6/13 (46 %)            |
| Total      | 25                 |                |       | 1511             | 558/1511 (37 %)          | 234/1511 (15 %)         | 75/234 (32 %) | 50/234 (21 %)          |

\* nPCR: nested PCR

**Supplementary Table S2: Quantification of allelic variants present in calves and embryos by deep sequencing.**

|                | <b>Sample</b> | <b>Maximum<br/>no. of reads<br/>per replicate</b> | <b>Wild type<br/>allele</b> | <b>9 bp<br/>deletion</b> | <b>21 bp<br/>deletion</b> | <b>24 bp<br/>deletion</b> | <b>66 bp<br/>deletion</b> |
|----------------|---------------|---------------------------------------------------|-----------------------------|--------------------------|---------------------------|---------------------------|---------------------------|
| <b>Calves</b>  | 1601, blood   | 85,470                                            | 1%                          | 85%                      | 13%                       | 0%                        | 0%                        |
|                | 1601, ear     | 83,754                                            | 2%                          | 81%                      | 17%                       | 0%                        | 0%                        |
|                | 1602, blood   | 46,928                                            | 2%                          | 98%                      | 0%                        | 0%                        | 0%                        |
|                | 424, ear      | 66,777                                            | 1%                          | 99%                      | 0%                        | 0%                        | 0%                        |
|                | 424, muscle   | 70,751                                            | 1%                          | 99%                      | 0%                        | 0%                        | 0%                        |
|                | 424, kidney   | 56,113                                            | 1%                          | 99%                      | 0%                        | 0%                        | 0%                        |
|                | 424, lung     | 45,747                                            | 2%                          | 98%                      | 0%                        | 0%                        | 0%                        |
|                | 424 , testis  | 49,052                                            | 2%                          | 98%                      | 0%                        | 0%                        | 0%                        |
|                | 424, liver    | 84,551                                            | 3%                          | 97%                      | 0%                        | 0%                        | 0%                        |
| <b>Embryos</b> | TS26 (1601)   | 80,196                                            | 8%                          | 91%                      | 0%                        | 0%                        | 0%                        |
|                | TS62 (1602)   | 82,067                                            | 1%                          | 99%                      | 0%                        | 0%                        | 0%                        |
|                | TS29 (424)    | 65,709                                            | 56%                         | 8%                       | 0%                        | 32%                       | 4%                        |
|                | WT1           | 54,025                                            | 99%                         | 1%                       | 0%                        | 0%                        | 0%                        |
|                | WT2           | 36,568                                            | 100%                        | 0%                       | 0%                        | 0%                        | 0%                        |
|                | WT3           | 75,636                                            | 100%                        | 0%                       | 0%                        | 0%                        | 0%                        |
|                | WT7           | 69,058                                            | 100%                        | 0%                       | 0%                        | 0%                        | 0%                        |
|                | WT8           | 53,413                                            | 100%                        | 0%                       | 0%                        | 0%                        | 0%                        |

**Supplementary Table S3: Milk composition determined by near infrared analysis.**

| <b>Sample</b> | <b>Cow age</b> | <b>Type of lactation</b> | <b>Time of lactation</b> | <b>Fat*</b> | <b>Protein*</b> | <b>Lactose*</b> | <b>Total Solid*</b> | <b>Solid Non Fat*</b> |
|---------------|----------------|--------------------------|--------------------------|-------------|-----------------|-----------------|---------------------|-----------------------|
| 1601          | 8 months       | induced                  | Day 5                    | 3.6         | 5.4             | 3.8             | 14.4                | 10.3                  |
| KD            | 9.5 months     | induced                  | Day 3                    | 4.2         | 5.0             | 4.5             | 15.1                | 10.4                  |
| WT            | 8 months       | induced                  | Day 3                    | 4.7         | 4.2             | 4.8             | 14.6                | 9.7                   |
| WTP           | > 2 years      | natural                  | Early lactation          | 3.7         | 4.2             | 4.4             | 13.0                | 9.4                   |

\* given as percentage (w/w).

**Supplementary Table S4: Primer sequences**

| <b>Primer</b> | <b>Sequence</b>                                                                                           | <b>Application</b>                |
|---------------|-----------------------------------------------------------------------------------------------------------|-----------------------------------|
| 290           | TCCTCTGCCTCTGCTCCAGT                                                                                      | qPCR, CSN2 locus                  |
| 291           | CGGACAGGACCGAGTACAGG                                                                                      | qPCR, CSN2 locus                  |
| 840           | AGGCCTCCTATTGTCCTCGT                                                                                      | Amplification of LGB locus        |
| 841           | GCAAAGGACACAGGGAGAAG                                                                                      | Amplification of LGB locus        |
| 986           | GCAGCCATGAAGTGCCTCCTGCTTGCCCTGGCCCTCACYTAGGCCCTCATYGTCA<br>CCCAGACCATGAAGGGCCTGGATATCCAGAAGGTTTCGAGGGTGSC | Homology repair template          |
| 994           | CTGGCCCTCACYTAGGCCCT                                                                                      | Primer specific for 9 bp deletion |
| 1015          | GCAAGACACTAAACGCCTGG                                                                                      | Amplification of LGB locus        |
| 1016          | TCGTCGGCAGCGTCAGATGTGTATAAAGAGACAGGCTGGCCCTCCTCCTGTATA                                                    | Illumina sequencing, LGB locus    |
| 1017          | GTCTCGTGGGCTCGGAGATGTGTATAAAGAGACAGGCAAGACACTAAACGCCTGG                                                   | Illumina sequencing, LGB locus    |
| 1048          | CUCACYUAGGCCCUCA                                                                                          | 9 bp deletion TaqMan probe, FAM   |
| 1051          | TGCAGCCATGAAGTGCCT                                                                                        | TaqMan PCR primer, LGB            |
| 1052          | CACCCTCGAACCTTCTGGATA                                                                                     | TaqMan PCR primer, LGB            |
| 1337          | CCTGTATAAGGCCCCGA                                                                                         | ddPCR primer                      |
| 1338          | CCCTCGAACCTTCTGGATA                                                                                       | ddPCR primer                      |
| 1339          | CACTTGTGGCGCCCAGGC                                                                                        | Drop-off probe, FAM               |



|      |                             |                      |
|------|-----------------------------|----------------------|
| 1340 | CTCCACTCCCTGCAGAGCTCAGAA    | Reference probe, HEX |
| 1341 | CCTCACTTAGGCCCTCATTGTCACC   | HDR probe, FAM       |
| 1342 | CCT CAC TTG TGG CGC CCA GGC | Dark probe           |

---
